# Supplementary material for: Global warming will largely increase CH 4 emissions from waste treatment: insight from the first city scale CH 4 concentration observation network in Hangzhou city, China
Source: Copernicus journal article supplement (doi:10.5194/acp-2022-549), 2022-10-17
Supplement: Supplementary file 1 [file acp-2022-549-supplement.pdf]

## Supplementary Information for

### Global warming will largely increase CH<sub>4</sub> emissions from waste treatment: insight from the first city scale CH<sub>4</sub> concentration observation network in Hangzhou, China

Cheng Hu<sup>1,2</sup>, Junqing Zhang<sup>1</sup>, Bing Qi<sup>3\*</sup>, Rongguang Du<sup>3\*</sup>, Xiaofei Xu<sup>4</sup>, Haoyu Xiong<sup>5</sup>, Huili

Liu<sup>1</sup>, Xinyue Ai<sup>1</sup>, Yiyi Peng<sup>1</sup>, Wei Xiao<sup>2</sup>

<sup>1</sup> College of Biology and the Environment, Joint Center for sustainable Forestry in Southern China, Nanjing Forestry University, Nanjing 210037, China

<sup>2</sup> Collaborative Innovation Center on Forecast and Evaluation of Meteorological Disasters (CIC-FEMD), Nanjing University of Information Science & Technology, Nanjing, China

<sup>3</sup> Hangzhou meteorological bureau, Hangzhou 310051, China

<sup>4</sup> Zhejiang Lin'an Atmospheric Background National Observation and Research Station, Hangzhou 311300, China

<sup>5</sup> College of Environment, Zhejiang University of Technology, Hangzhou 311300, China

\*Corresponding authors: Bing Qi (bill\_129@sina.com), Rongguang Du (drg1998@163.com).

To be submitted to: *ACP*

### Section S1. Choice of background based on monthly footprint

We carefully choose the CH<sub>4</sub> background for each month by identifying the main air flows from monthly footprint (Figure S3). The final choice is displayed in Table S2. And we should note because the difference between YON and other four sites of TAP, RYO, WLG and UUM sites were larger as 100 ppb from May to August, which indicates there is large uncertainty when air flows come from directions of both YON site and other four sites. We found the footprint in July showed obvious air follows both from the South China Sea (YON site) and north east (RYO site), and to reduce the potential large uncertainty in CH<sub>4</sub> simulations, we used the averages of both sites as the background in July.

### Section S2. Multiplicative scaling factor method

We also used the multiplicative scaling factor (hereafter MSF) method to constrain emissions by using observations at Linan site, which has been applied broadly to constrain greenhouse gas and other tracer gas emissions. The MSF SFs were derived by dividing the observed enhancement by the simulated enhancement (Sargent et al., 2018; He et al., 2020),

$$SF(CH_4) = \frac{CH_{4\_obs} - CH_{4\_bg} - \Delta CH_{4\_wetland}}{\Delta CH_{4\_anthro}} \quad (3)$$

where SF(CH<sub>4</sub>) is the scaling factor for anthropogenic CH<sub>4</sub> emissions (excluding agricultural soil in this study), and CH<sub>4\_obs</sub>, CH<sub>4\_bg</sub>, ΔCH<sub>4\_wetland</sub> and ΔCH<sub>4\_anthro</sub> are the CH<sub>4</sub> concentration observations, background CH<sub>4</sub>, simulated wetland CH<sub>4</sub> enhancement, and simulated anthropogenic CH<sub>4</sub> enhancement (excluding agricultural soil), respectively.

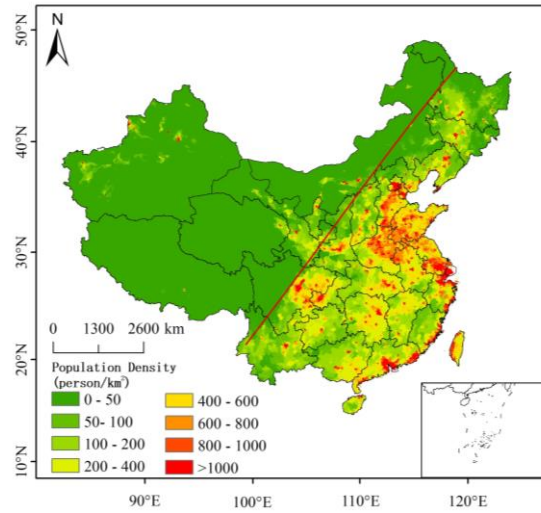

Figure S1. Population density for China in year of 2019, with the red line represents Heihe-Tengchong line, with 94% of national total population lived in the east of this line.

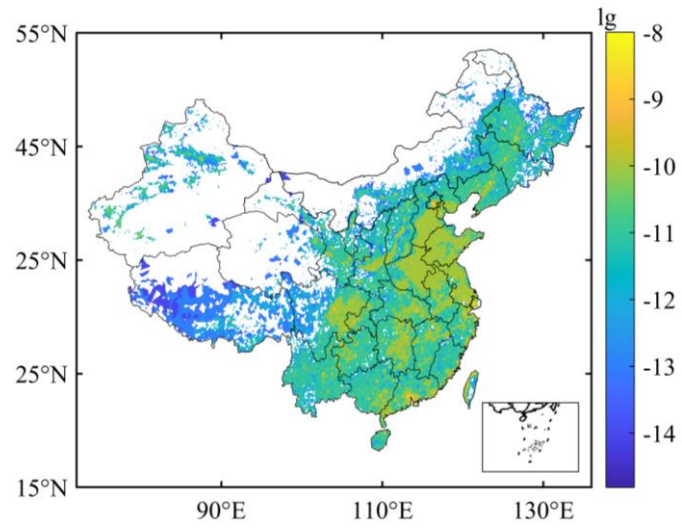

Figure S2. Waste treatment CH<sub>4</sub> emissions in EDGAR v6.0 inventory, units for emissions: kg m<sup>-2</sup> s<sup>-1</sup>.

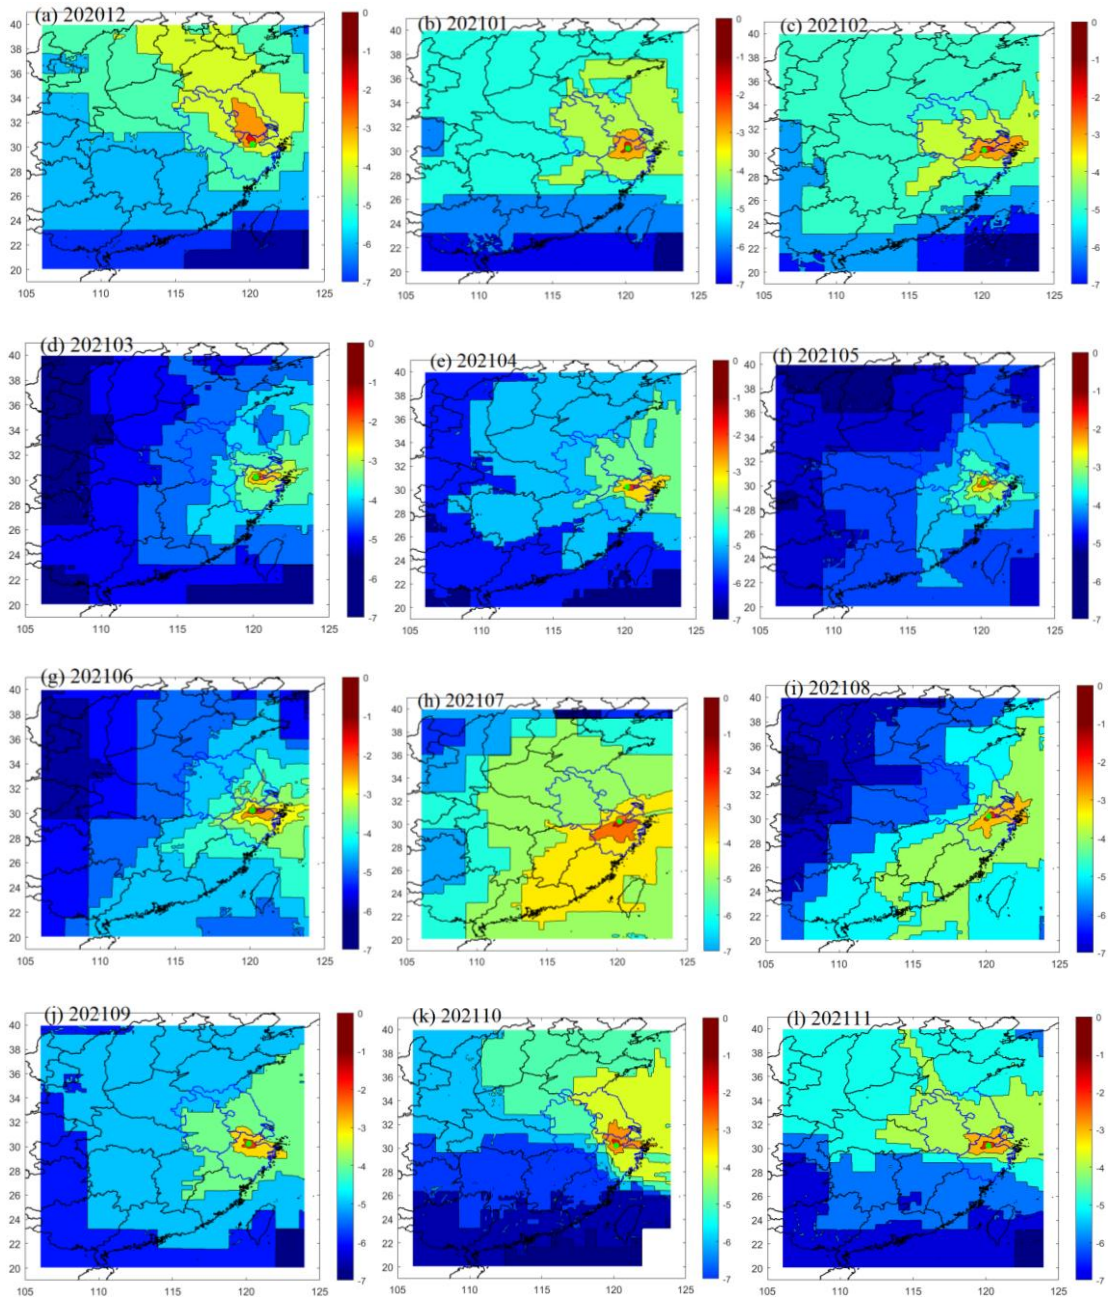

Figure S3. Monthly averaged footprint from December, 2020 to November, 2021.

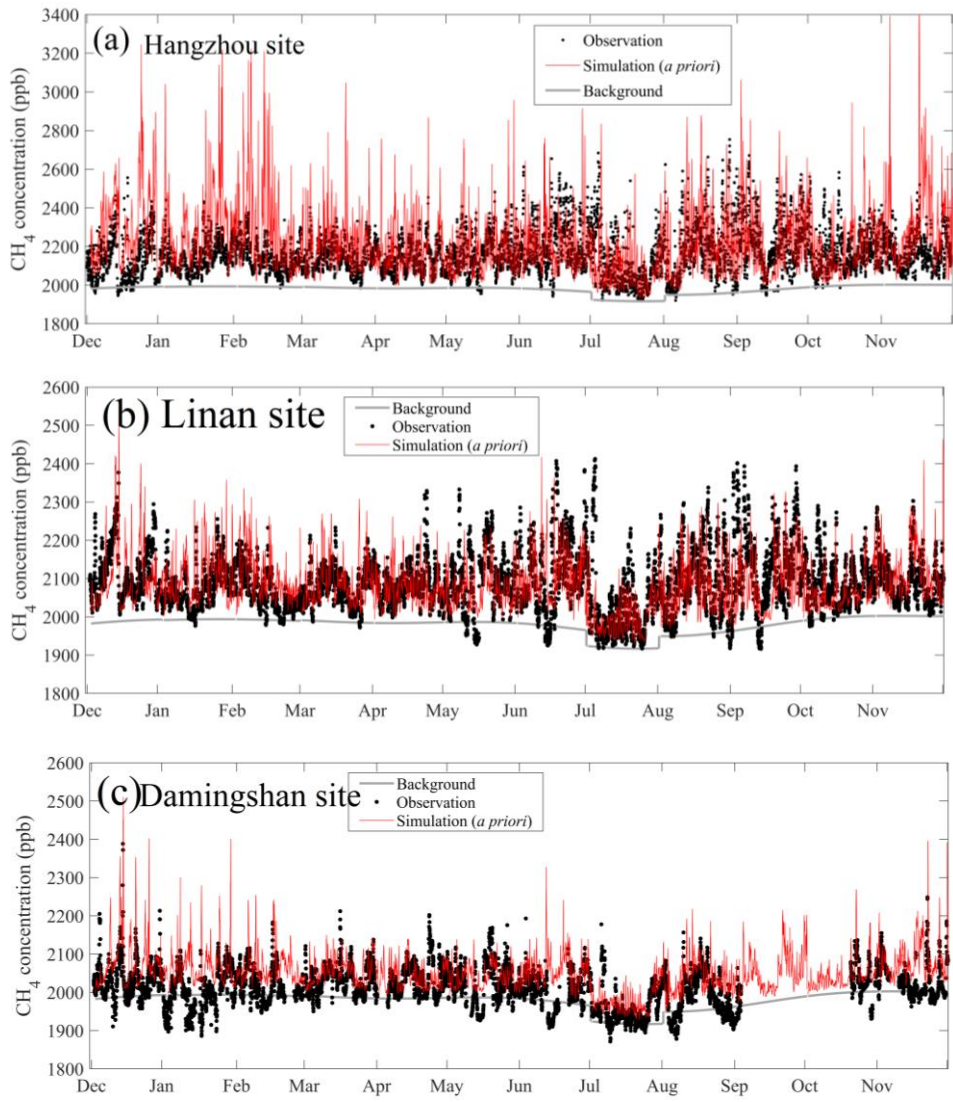

Figure S4. Comparisons between hourly CH<sub>4</sub> concentration simulations and observations at three sites.

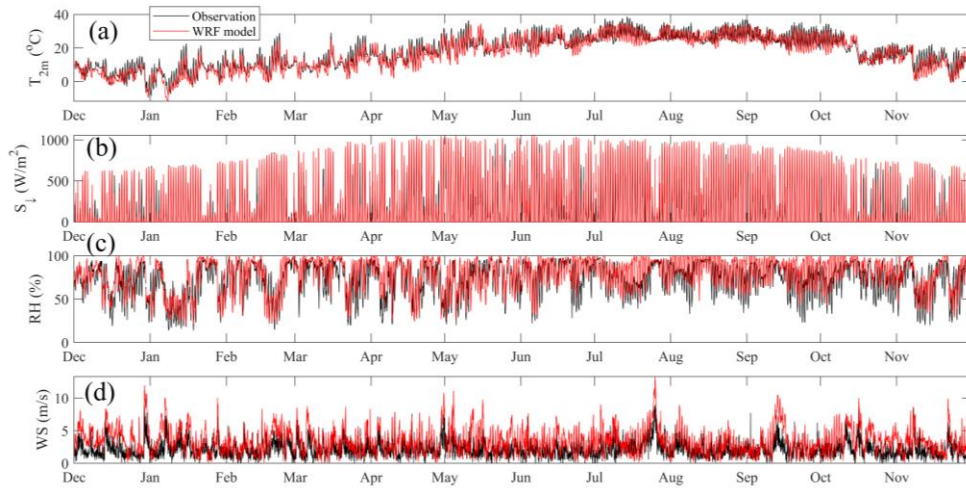

Figure S5. Comparisons between observed and simulated meteorological fields for air temperature at 2 m ( $T_{2m}$ ), relative humidity (RH), downward solar radiation ( $S_{\downarrow}$ ), and wind speed (WS) at 10 m height

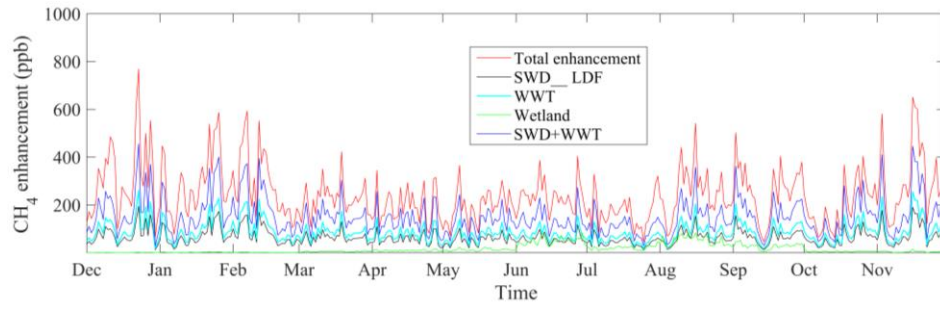

Figure S6. Daily variations of simulated CH<sub>4</sub> enhancements from different categories for Hangzhou site.



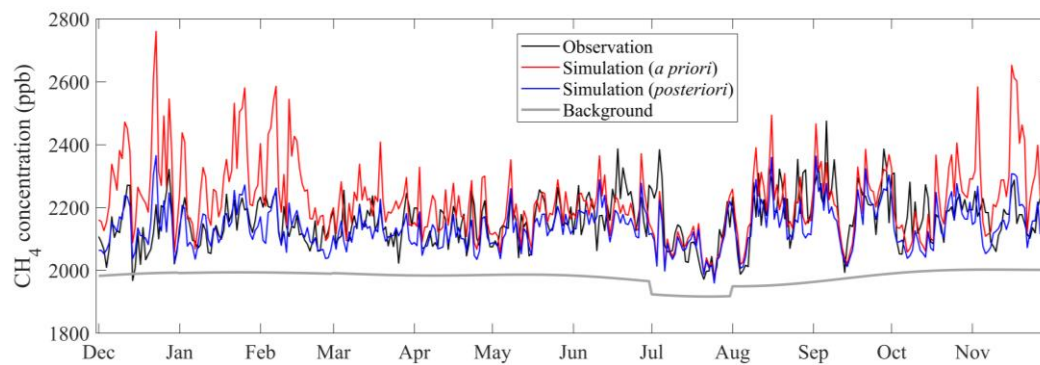

Figure S7. Daily CH<sub>4</sub> concentrations comparisons using both *a priori* and *posteriori* emissions.

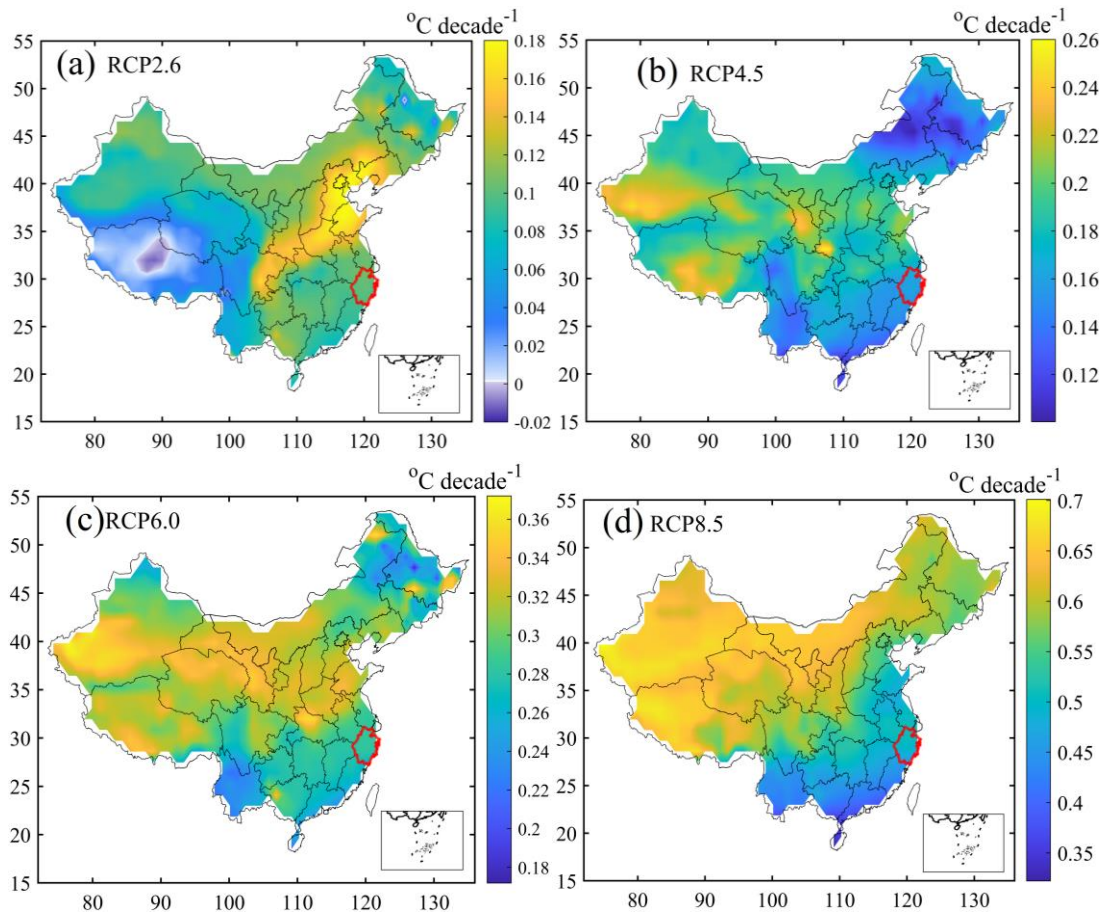

Figure S8. Spatial distributions of air temperature trends in China for (a) RCP2.6, (b) RCP4.5, (c) RCP6.0, and (d) RCP8.5 scenarios. Note the red boundary is Zhejiang province, and the trends represents years from 2020 to 2100.

Table S1. The choice of CH<sub>4</sub> background based on simulated monthly footprint, ‘Y’ indicates concentration at this background site (or averages of both) will be used as CH<sub>4</sub> background for this month.

| Sites | Dec | Jan | Feb | Mar | Apr | May | Jun | Jul | Aug | Sep | Oct | Nov |
|-------|-----|-----|-----|-----|-----|-----|-----|-----|-----|-----|-----|-----|
| TAP   |     |     |     |     |     |     |     |     |     |     |     |     |
| YON   |     |     |     |     |     |     |     | Y   |     |     |     |     |
| RYO   |     | Y   | Y   | Y   | Y   | Y   | Y   | Y   | Y   | Y   | Y   | Y   |
| WLG   |     |     |     |     |     |     |     |     |     |     |     |     |
| UUM   | Y   | Y   |     |     |     |     |     |     |     |     |     |     |

Table S2. Normalized monthly CH<sub>4</sub> SFs based on annual averages for waste treatment, note we calculate the normalized monthly SFs by dividing monthly SFs by annual averages.

| Month | Case 1 | Case 2 | Case 3 | Average( $\pm$ STD) |
|-------|--------|--------|--------|---------------------|
| 1     | 0.59   | 0.64   | 0.72   | 0.65( $\pm$ 0.13)   |
| 2     | 0.40   | 0.49   | 0.54   | 0.48( $\pm$ 0.14)   |
| 3     | 0.79   | 0.87   | 0.83   | 0.83( $\pm$ 0.08)   |
| 4     | 0.93   | 0.91   | 0.88   | 0.91( $\pm$ 0.05)   |
| 5     | 1.25   | 1.21   | 1.17   | 1.21( $\pm$ 0.08)   |
| 6     | 1.19   | 1.21   | 1.15   | 1.18( $\pm$ 0.06)   |
| 7     | 1.78   | 1.66   | 1.60   | 1.68( $\pm$ 0.18)   |
| 8     | 1.25   | 1.25   | 1.21   | 1.24( $\pm$ 0.04)   |
| 9     | 1.43   | 1.38   | 1.33   | 1.38( $\pm$ 0.10)   |
| 10    | 1.21   | 1.15   | 1.12   | 1.16( $\pm$ 0.09)   |
| 11    | 0.55   | 0.60   | 0.67   | 0.61( $\pm$ 0.12)   |
| 12    | 0.63   | 0.62   | 0.77   | 0.67( $\pm$ 0.15)   |
